# Supplementary material for: Conformational heterogeneity of Savinase from NMR, HDX-MS and X-ray diffraction analysis
Source: PubMed Central journal article supplement (PMC7323712; doi:10.7717/peerj.9408), 2020-06-26

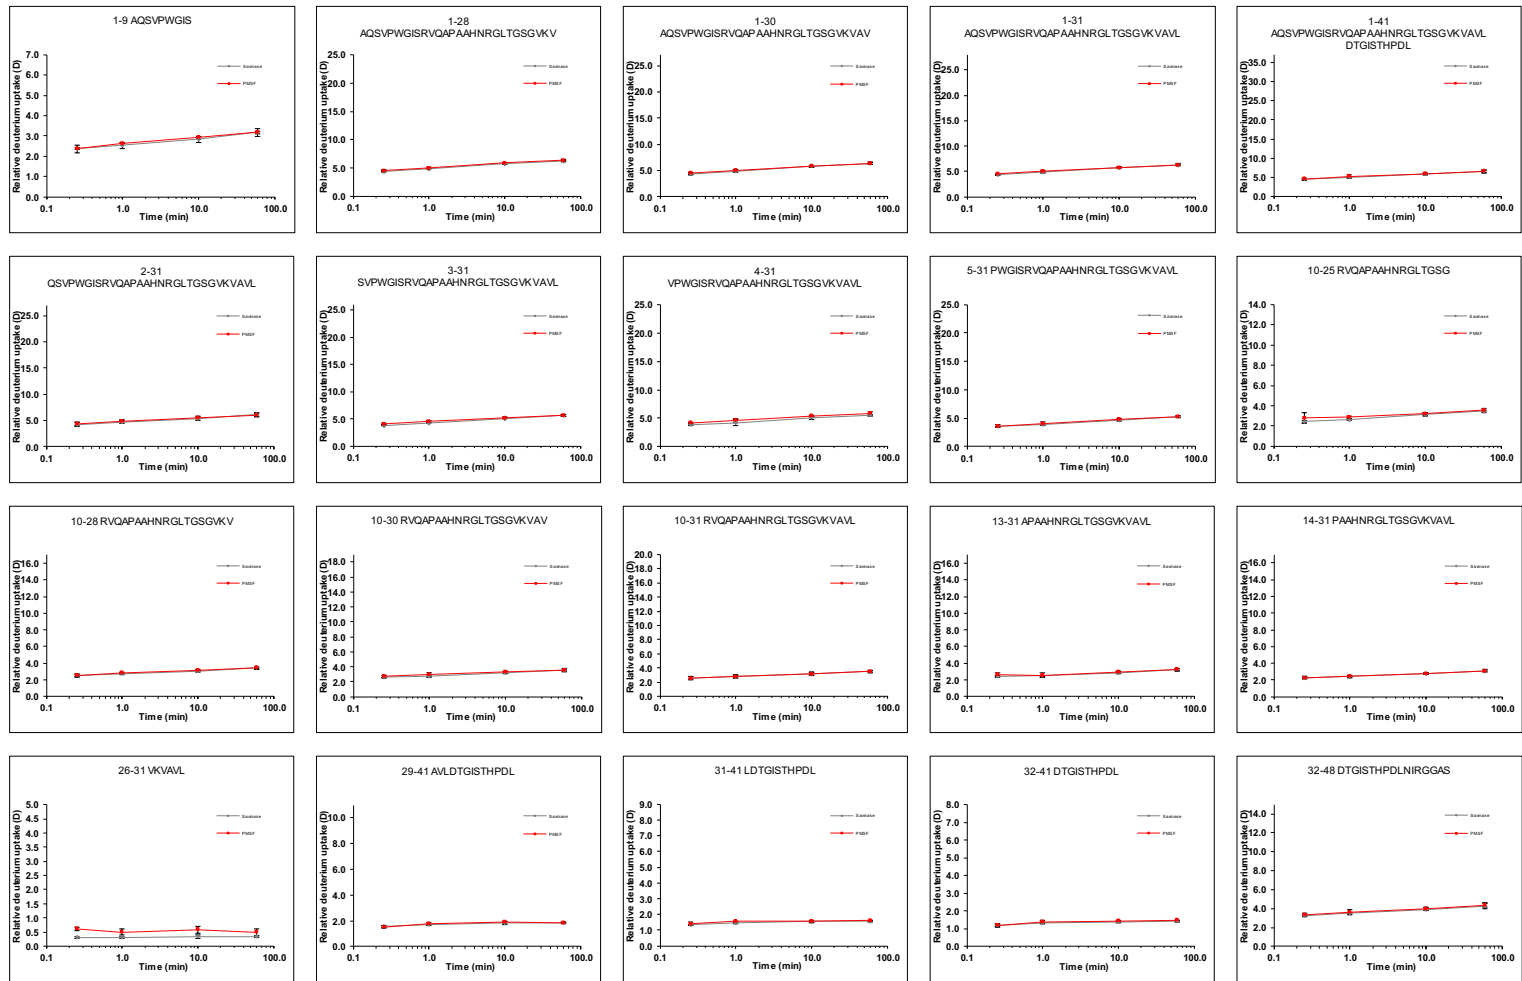

**Figure S3** HDX-MS of Savinase. Time dependent changes in deuterium content for all peptides analysed. Data for uninhibited and inhibited Savinase are shown in grey and red, respectively. Maximum labelled controls are shown in black. Error bars indicate standard deviations for time points measured in replicates ( $n = 3$ ).

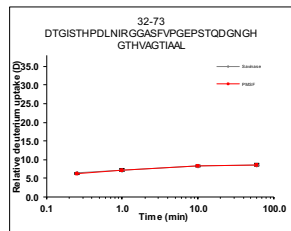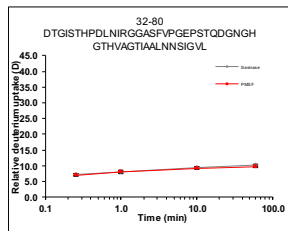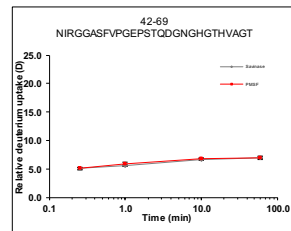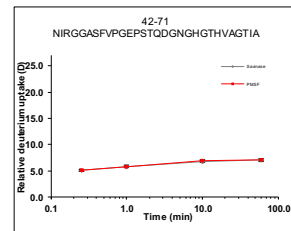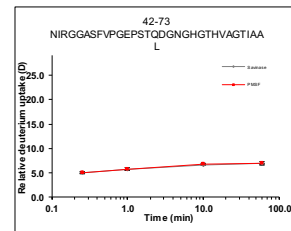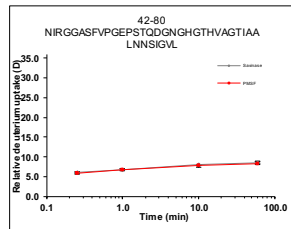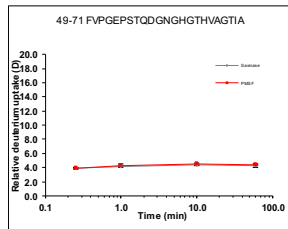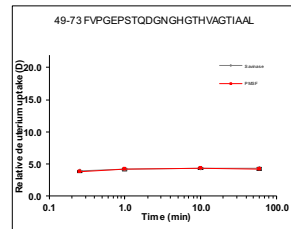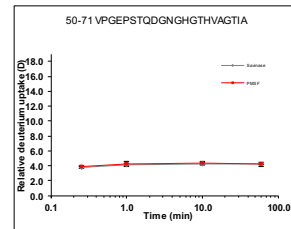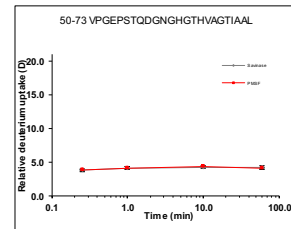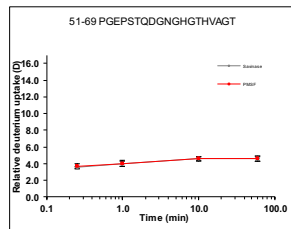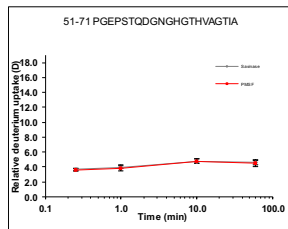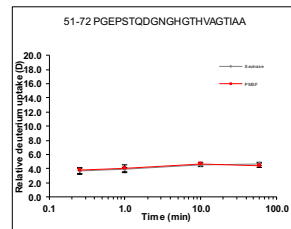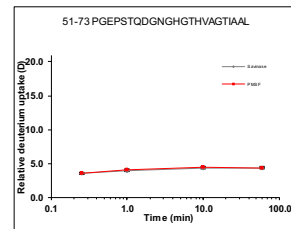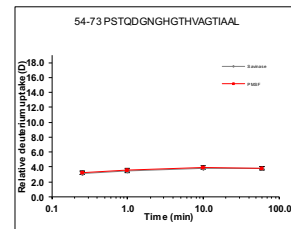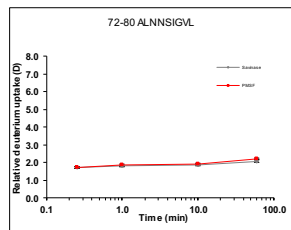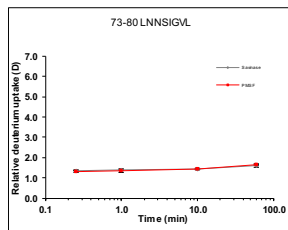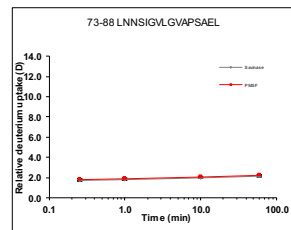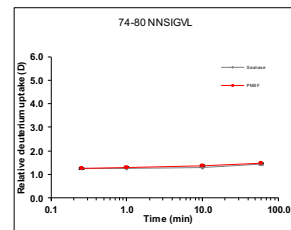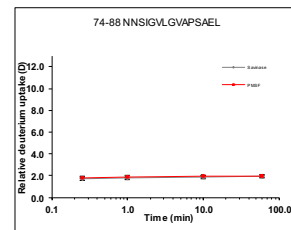

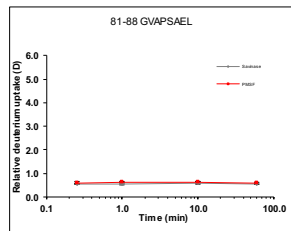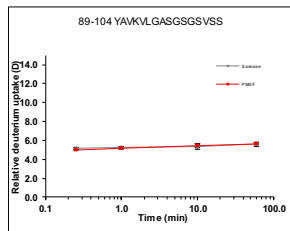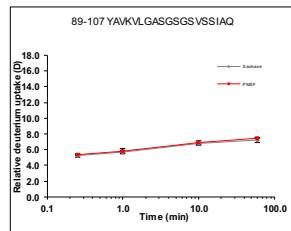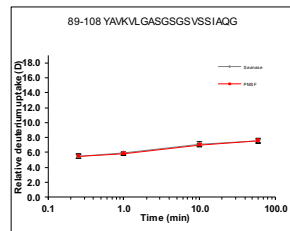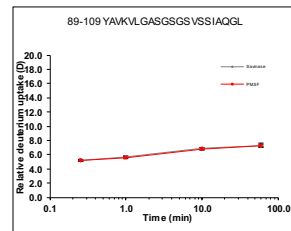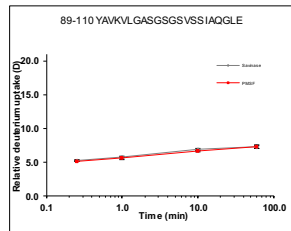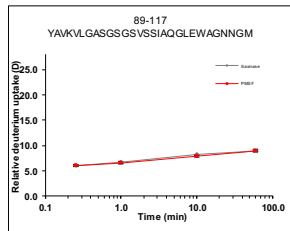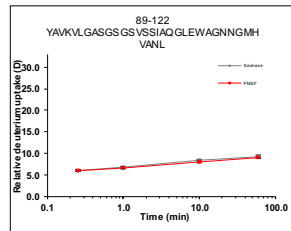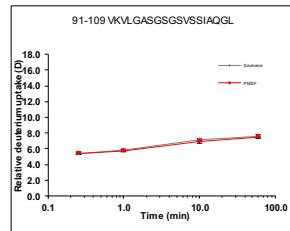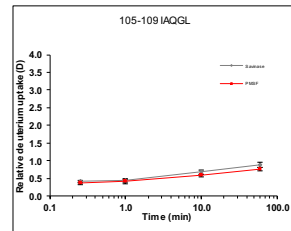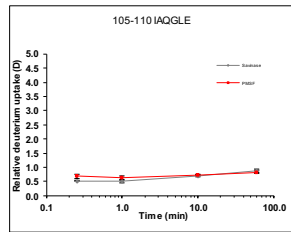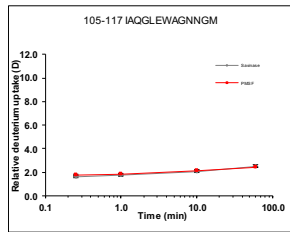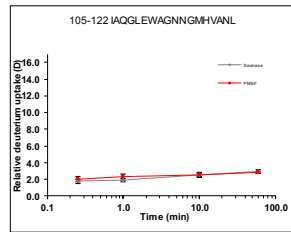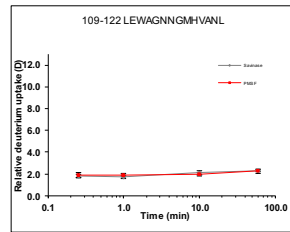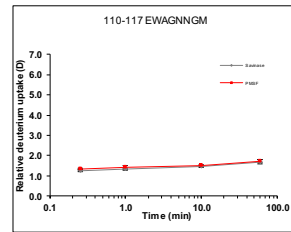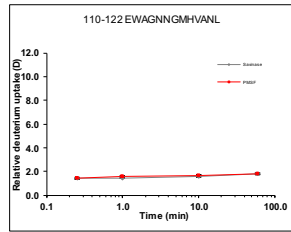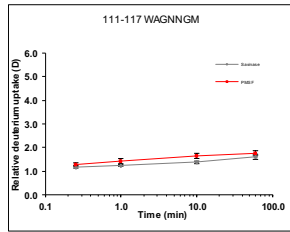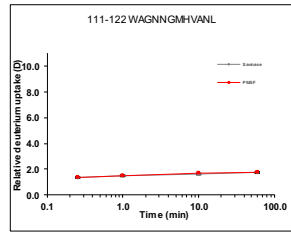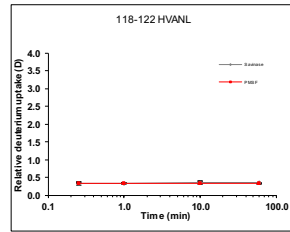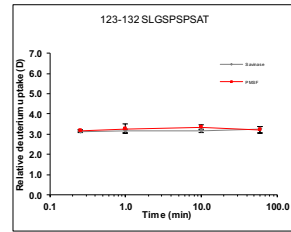

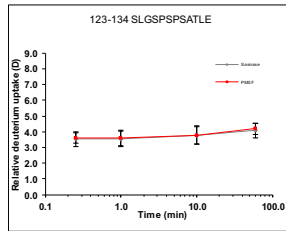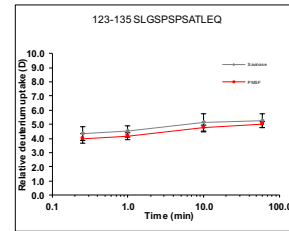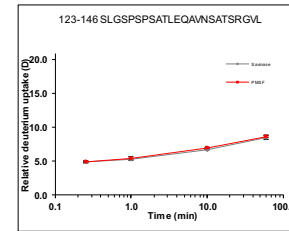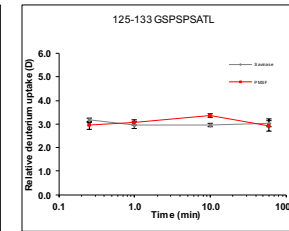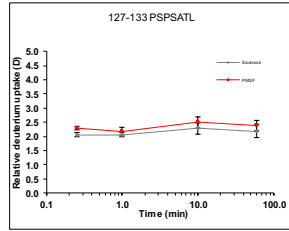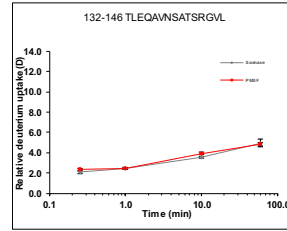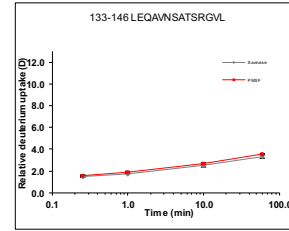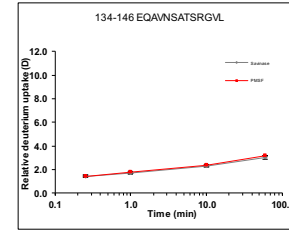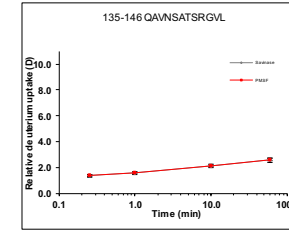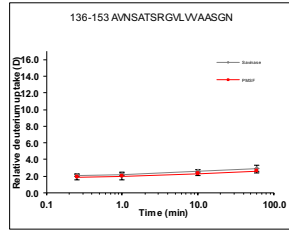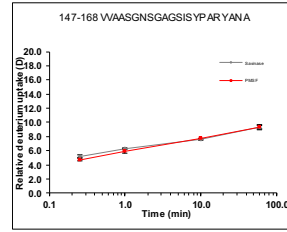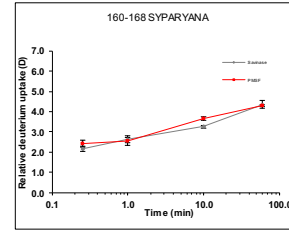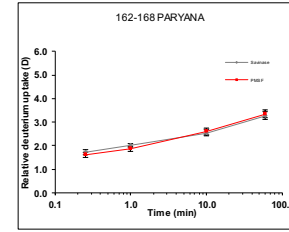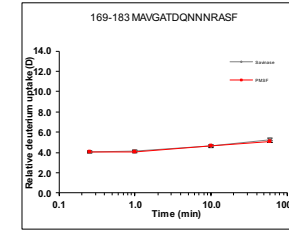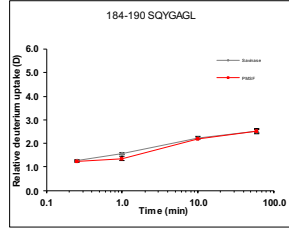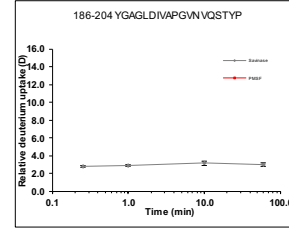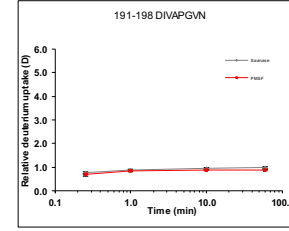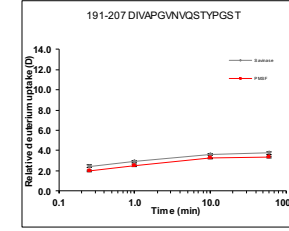

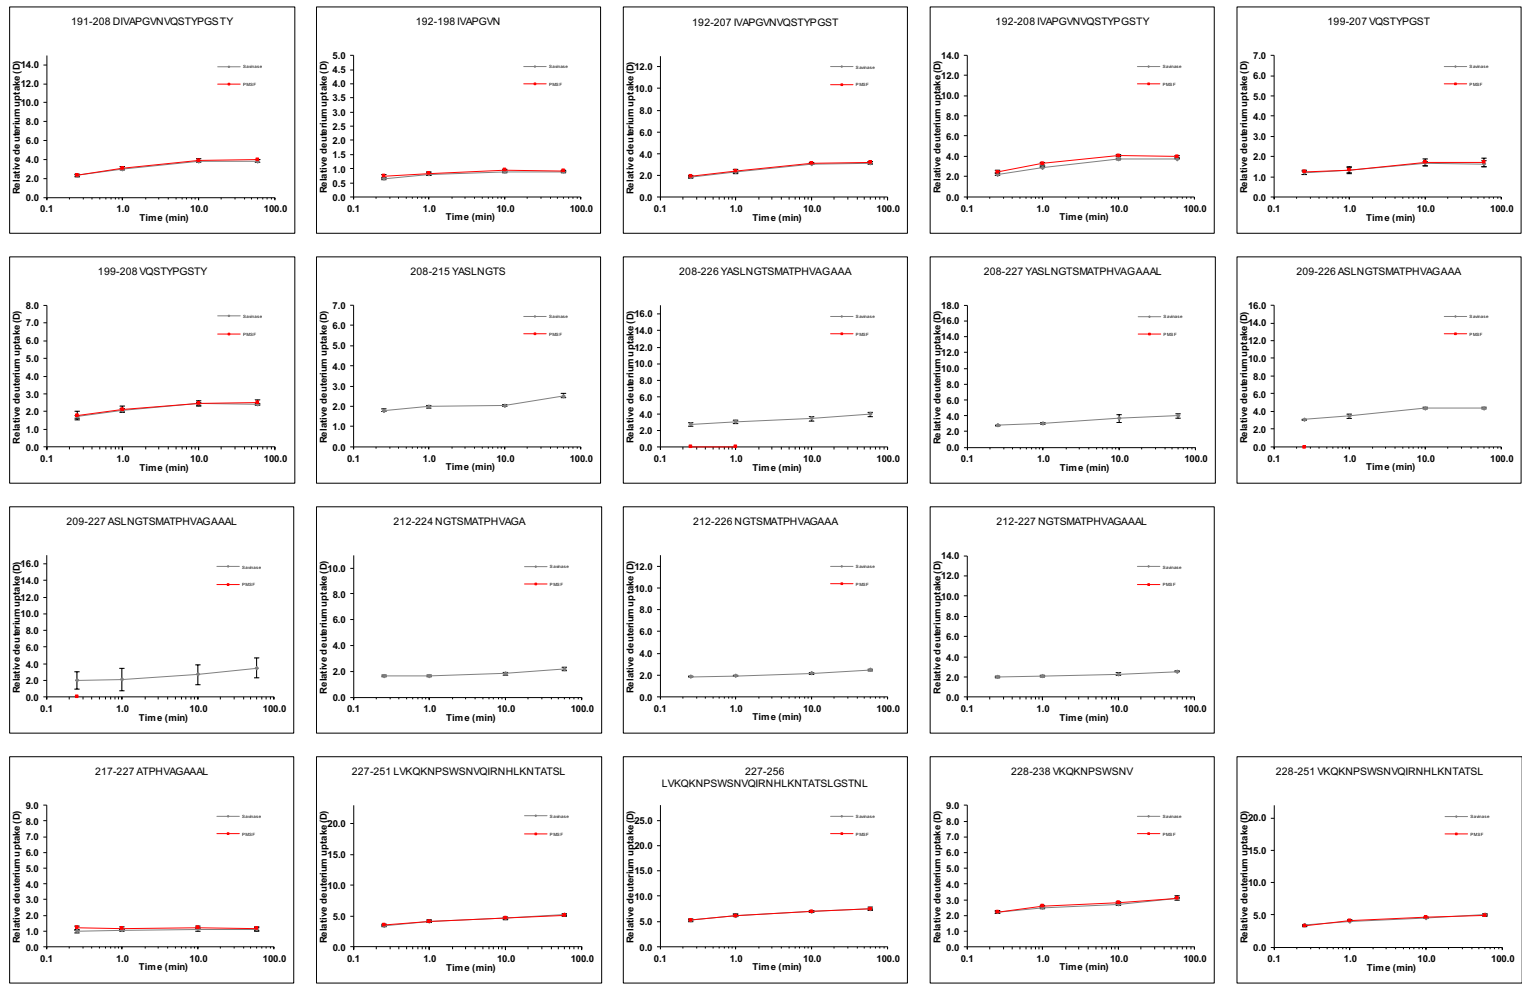

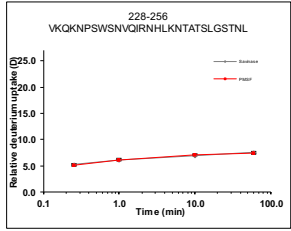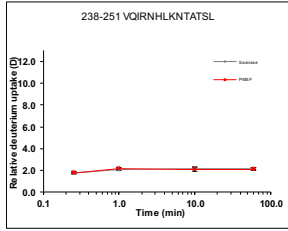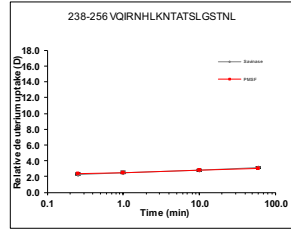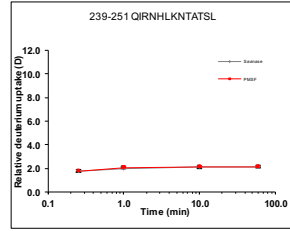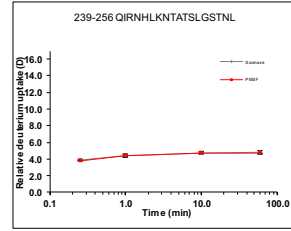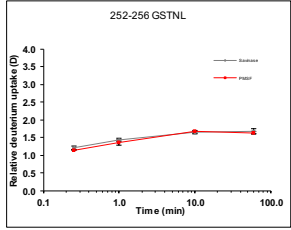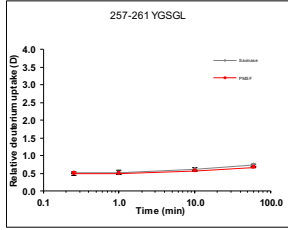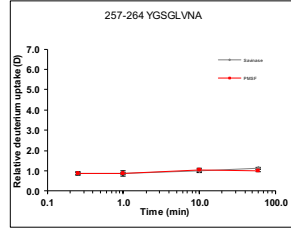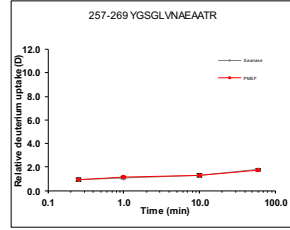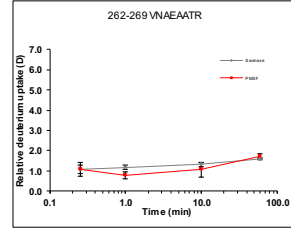

Supplement: peerj-08-9408-s003.pdf [file peerj-08-9408-s003.pdf]
