# Supplementary material for: Conformational heterogeneity of Savinase from NMR, HDX-MS and X-ray diffraction analysis
Source: PubMed Central journal article supplement (PMC7323712; doi:10.7717/peerj.9408), 2020-06-26

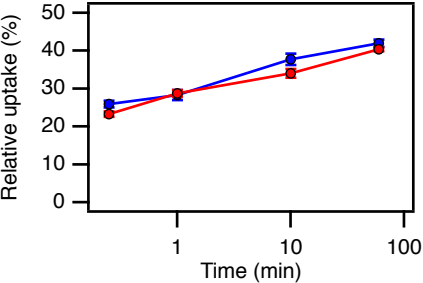

Supplement: peerj-08-9408-s002.pdf [file peerj-08-9408-s002.pdf]
