# Supplementary material for: Conformational heterogeneity of Savinase from NMR, HDX-MS and X-ray diffraction analysis
Source: PubMed Central journal article supplement (PMC7323712; doi:10.7717/peerj.9408), 2020-06-26
Supplement: peerj-08-9408-s006.pdf [file peerj-08-9408-s006.pdf]

**Table S3.** Crystallographic statistics

| <b>Data set</b>                         | RT                                                    | cryo                                                  |
|-----------------------------------------|-------------------------------------------------------|-------------------------------------------------------|
| <i>Data collection</i>                  |                                                       |                                                       |
| PDB code                                | 6Y5T                                                  | 6Y5S                                                  |
| Beamline, Diamond Light Source          | I03                                                   | I04                                                   |
| Wavelength (Å)                          | 0.88560                                               | 0.91474                                               |
| Space group                             | <i>P</i> 2 <sub>1</sub> 2 <sub>1</sub> 2 <sub>1</sub> | <i>P</i> 2 <sub>1</sub> 2 <sub>1</sub> 2 <sub>1</sub> |
| Unit cell (a, b, c) (Å)                 | 47.70, 62.205, 75.766                                 | 47.08, 62.03, 74.95                                   |
| Resolution range (Å)                    | 48.08 – 1.10                                          | 47.08 – 0.95                                          |
| No of reflections collected             | 449,880 (21,456)                                      | 908,583 (39,594)                                      |
| No. unique reflections                  | 91,686 (4,525)                                        | 135791 (7,688)                                        |
| Monomers in asymmetric unit             | 1                                                     | 1                                                     |
| Completeness (%)                        | 99.7 (99.9)                                           | 98.2 (94.8)                                           |
| $\langle I/\sigma(I) \rangle$           | 10.8 (1.2)                                            | 13.7 (1.4)                                            |
| CC <sub>1/2</sub>                       | 0.998 (0.502)                                         | 0.998 (0.605)                                         |
| Multiplicity                            | 4.9 (4.7)                                             | 6.7 (5.2)                                             |
| $R_{\text{merge}}$                      | 0.070 (1.341)                                         | 0.073 (1.075)                                         |
| <i>Refinement statistics</i>            |                                                       |                                                       |
| Reflections for $R_{\text{free}}$ (%)   | 4.92                                                  | 4.98                                                  |
| $R_{\text{work}} / R_{\text{free}}$ (%) | 13.1 / 15.0                                           | 14.1 / 15.5                                           |
| RMS deviations from idea geometry       |                                                       |                                                       |
| Bond length (Å)                         | 0.006                                                 | 0.005                                                 |
| Bond angles (°)                         | 0.869                                                 | 0.927                                                 |
| Chiral centres (Å <sup>3</sup> )        | 0.081                                                 | 0.088                                                 |
| Planar groups (Å)                       | 0.006                                                 | 0.006                                                 |
| Average B-factor (protein)              | 15.1                                                  | 9.7                                                   |
| Ramachandran plot                       |                                                       |                                                       |
| Preferred regions (%)                   | 97.8                                                  | 97.0                                                  |
| Allowed regions (%)                     | 2.2                                                   | 3.0                                                   |
| Outliers (%)                            | 0                                                     | 0                                                     |

Statistics for the highest-resolution shells are shown in parentheses.
