# Supplementary material for: Conformational heterogeneity of Savinase from NMR, HDX-MS and X-ray diffraction analysis
Source: PubMed Central journal article supplement (PMC7323712; doi:10.7717/peerj.9408), 2020-06-26
Supplement: peerj-08-9408-s007.pdf [file peerj-08-9408-s007.pdf]

**Table S4.** Amino acid residues in Savinase with alternative conformations in the RT and cryo crystals.

| RT     | Cryo   |
|--------|--------|
| Ser3   | Ser3   |
| Ser9   |        |
| Thr22  |        |
| Ser24  |        |
| Ser36  | Ser36  |
| Thr37  |        |
| Pro39  |        |
| Asn42  |        |
| Ser55  |        |
| Ser76  | Ser76  |
|        | Pro84  |
| Tyr89  | Tyr89  |
| Ser103 | Ser103 |
| Ser104 | Ser104 |
|        | Ser128 |
| Pro129 | Pro129 |
|        | Ser130 |
|        | Ala131 |
|        | Thr132 |
| Leu133 |        |
| Ser142 | Ser142 |
| Val148 |        |
| Ser158 | Ser158 |
| Ser160 | Ser160 |
|        | Asn178 |
| Val197 |        |
| Asn198 | Asn198 |
| Ser206 | Ser206 |
| Ser210 | Ser210 |
| Asn212 | Asn212 |
| Ser215 |        |
|        | Lys231 |
| Pro233 |        |
|        | Val238 |
|        | Asn242 |
|        | Ser253 |
| Tyr257 | Tyr257 |
