# Supplementary material for: Conformational heterogeneity of Savinase from NMR, HDX-MS and X-ray diffraction analysis
Source: PeerJ. 2020 Jun 26;8:e9408. doi: 10.7717/peerj.9408 (PMC7323712; doi:10.7717/peerj.9408)
Supplement: Table S1 [file peerj-08-9408-s004.xlsx]

## Sheet: Sheet1
Data Set	Savinase (WT, PMSF)
HDX reaction details	20 mM Bis-Tris, 10 mM CaCl2, pD = 7.0, 25 °C
HDX time course	0.25, 1, 10, 60 min
HDX control sample	MaxD control: Savinase were incubated overnight in 8 M deuterated GndHCl (95% D2O)
Back-exchange (mean / IQR)	39.7 % / 11.8 %
# of Peptides	110
Sequence coverage	0.97
Average peptide length / Redundancy	17.35 / 7.09
Replicates (biological or technical)	3 (technical)
Repeatability	0.144 (average standard deviation)
Significant differences in HDX (delta HDX > X D)	N/A
