# Supplementary material for: Conformational heterogeneity of Savinase from NMR, HDX-MS and X-ray diffraction analysis
Source: PeerJ. 2020 Jun 26;8:e9408. doi: 10.7717/peerj.9408 (PMC7323712; doi:10.7717/peerj.9408)
Supplement: Table S2 [file peerj-08-9408-s005.xlsx]

## Sheet: HDX Data Table (Table S2)
					Uptake - WILDTYPE (D)				Uptake - PMSF (D)				Uptake - Control Sample (D)	Uptake error (SD) - WILDTYPE (D)				Uptake error (SD) - PMSF (D)				Uptake error (SD) - Control Sample (D)
Start	End	Sequence	Peptide mass (Da)	Retention time (min)	0.25 min	1 min	10 min	60 min	0.25 min	1 min	10 min	60 min	MAX	0.25 min	1 min	10 min	60 min	0.25 min	1 min	10 min	60 min	MAX
1	9	AQSVPWGIS	944.484	5.31808	2.3512	2.53748	2.82298	3.16473	2.38345	2.64551	2.92045	3.17542	6.50098	0.173276	0.144961	0.153311	0.182174	0.035093	0.034705	0.060185	0.05942	0.037958
1	28	AQSVPWGISRVQAPAAHNRGLTGSGVKV	2843.54	4.23239	4.46095	4.86222	5.70786	6.29822	4.4856	5.00167	5.87177	6.34076	11.4623	0.117974	0.060698	0.145493	0.220885	0.206999	0.203299	0.121963	0.114261	0.045071
1	30	AQSVPWGISRVQAPAAHNRGLTGSGVKVAV	3013.64	4.31675	4.38085	4.81673	5.73005	6.3467	4.44153	5.03602	5.82082	6.33998	13.8379	0.166322	0.112471	0.109475	0.245833	0.202421	0.179557	0.178993	0.160169	0.077626
1	31	AQSVPWGISRVQAPAAHNRGLTGSGVKVAVL	3126.73	4.60317	4.33655	4.84334	5.71497	6.33022	4.46662	4.98494	5.81968	6.33508	4.47416	0.113143	0.096083	0.143532	0.19835	0.103813	0.20685	0.124151	0.074144	0.024497
1	41	AQSVPWGISRVQAPAAHNRGLTGSGVKVAVLDTGISTHPDL	4163.21	4.71129	4.43365	5.04435	5.92108	6.51057	4.50031	5.24787	5.95471	6.62236	3.69523	0.196852	0.229866	0.238943	0.325488	0.176907	0.282282	0.220993	0.315404	0.072111
2	31	QSVPWGISRVQAPAAHNRGLTGSGVKVAVL	3055.69	4.60393	4.23878	4.72623	5.3482	6.08066	4.36853	4.80338	5.53884	6.038	14.708	0.351464	0.246806	0.403671	0.345074	0.291832	0.301472	0.158899	0.251676	0.15835
3	31	SVPWGISRVQAPAAHNRGLTGSGVKVAVL	2927.63	4.60455	3.83057	4.26142	5.07056	5.62884	4.06792	4.52657	5.25658	5.70916	3.23066	0.125789	0.04561	0.094037	0.171628	0.185545	0.204662	0.136347	0.169782	0.026721
4	31	VPWGISRVQAPAAHNRGLTGSGVKVAVL	2840.6	4.6069	3.87088	4.14255	4.97882	5.56859	4.18908	4.55773	5.34142	5.84895	6.28556	0.131201	0.538661	0.254714	0.143367	0.155985	0.263855	0.189361	0.293343	0.035675
5	31	PWGISRVQAPAAHNRGLTGSGVKVAVL	2741.53	4.60499	3.50674	3.86804	4.68457	5.25112	3.64657	4.04466	4.76792	5.28939	3.44476	0.103595	0.054676	0.16096	0.210784	0.181871	0.283921	0.176677	0.169101	0.012521
10	25	RVQAPAAHNRGLTGSG	1591.84	2.39727	2.42593	2.65111	3.14299	3.52309	2.79989	2.85479	3.20482	3.53052	3.13896	0.127394	0.105081	0.160906	0.188389	0.486482	0.119173	0.14071	0.053174	0.018285
10	28	RVQAPAAHNRGLTGSGVKV	1918.07	3.1197	2.50152	2.69197	3.05934	3.39777	2.49928	2.78635	3.11309	3.41019	6.18871	0.097847	0.087119	0.092635	0.148882	0.215114	0.100764	0.12	0.077171	0.098508
10	30	RVQAPAAHNRGLTGSGVKVAV	2088.18	3.37224	2.56544	2.74658	3.1868	3.50442	2.675	2.91495	3.29746	3.57194	2.28149	0.095749	0.11532	0.150966	0.187202	0.200323	0.246739	0.180742	0.16354	0.09066
10	31	RVQAPAAHNRGLTGSGVKVAVL	2201.26	3.84414	2.58153	2.76857	3.1659	3.50144	2.60909	2.85176	3.21027	3.49586	3.16326	0.217797	0.195394	0.196314	0.20108	0.173103	0.212649	0.172108	0.14021	0.155001
13	31	APAAHNRGLTGSGVKVAVL	1818.03	3.84526	2.40208	2.47706	2.86215	3.20571	2.64508	2.54535	2.92329	3.22725	2.43035	0.12132	0.068558	0.174993	0.141335	0.231883	0.236641	0.113929	0.070899	0.058648
14	31	PAAHNRGLTGSGVKVAVL	1747	3.84326	2.27152	2.42557	2.76697	3.11635	2.227	2.46524	2.79732	3.06618	3.61429	0.129501	0.131244	0.145392	0.177575	0.106696	0.100294	0.102225	0.078362	0.067085
26	31	VKVAVL	628.439	4.22648	0.310565	0.312473	0.344653	0.335993	0.614911	0.498636	0.576187	0.487655	5.71369	0.027825	0.028449	0.057836	0.020052	0.057533	0.106472	0.124869	0.127081	0.029471
29	41	AVLDTGISTHPDL	1338.69	4.63016	1.55152	1.70823	1.81173	1.85048	1.53263	1.75543	1.86994	1.85235	5.26249	0.050316	0.024622	0.110881	0.040995	0.077327	0.090124	0.091712	0.054719	0.014063
31	41	LDTGISTHPDL	1168.58	4.33648	1.33441	1.4482	1.5641	1.5615	1.41107	1.56027	1.56118	1.61487	6.03598	0.039341	0.024793	0.022635	0.062015	0.101127	0.030691	0.084929	0.023759	0.107622
32	41	DTGISTHPDL	1055.5	4.05261	1.19179	1.33492	1.36205	1.42334	1.17338	1.37042	1.42724	1.45069	9.30311	0.07079	0.049747	0.053412	0.067902	0.071899	0.083467	0.050163	0.023084	0.138712
32	48	DTGISTHPDLNIRGGAS	1710.84	3.76837	3.27774	3.51306	3.90494	4.27713	3.36277	3.60921	3.97936	4.36543	7.43898	0.092397	0.078416	0.120363	0.269626	0.177614	0.252733	0.222046	0.237531	0.064467
32	73	DTGISTHPDLNIRGGASFVPGEPSTQDGNGHGTHVAGTIAAL	4125	4.61757	6.33331	7.1514	8.24933	8.61812	6.27064	7.19532	8.28092	8.5553	5.25581	0.215872	0.155266	0.10165	0.312052	0.212914	0.327634	0.190734	0.210795	0.01761
32	80	DTGISTHPDLNIRGGASFVPGEPSTQDGNGHGTHVAGTIAALNNSIGVL	4822.38	5.19729	7.15732	8.00831	9.41403	10.1288	7.01542	8.02499	9.14987	9.72334	12.7494	0.313817	0.371419	0.153642	0.402844	0.376865	0.527726	0.38689	0.453683	0.145712
42	69	NIRGGASFVPGEPSTQDGNGHGTHVAGT	2720.28	3.61367	5.05126	5.60737	6.63407	6.89526	5.09479	5.82188	6.85411	6.9403	5.54139	0.197661	0.189822	0.137851	0.307324	0.141073	0.294108	0.128656	0.089258	0.01764
42	71	NIRGGASFVPGEPSTQDGNGHGTHVAGTIA	2904.4	3.84607	5.11462	5.76179	6.73861	7.01347	5.07238	5.80516	6.84421	7.02611	6.25941	0.149759	0.066652	0.139443	0.290266	0.161928	0.265704	0.151605	0.125867	0.035935
42	73	NIRGGASFVPGEPSTQDGNGHGTHVAGTIAAL	3088.52	4.45102	5.0381	5.63482	6.62855	6.94777	5.0651	5.7703	6.78573	6.94332	3.86338	0.146329	0.058416	0.086337	0.27775	0.167479	0.27484	0.122166	0.091969	0.036402
42	80	NIRGGASFVPGEPSTQDGNGHGTHVAGTIAALNNSIGVL	3785.9	5.21903	6.03227	6.77256	7.94104	8.58588	5.87969	6.71794	7.78266	8.33875	ND	0.184365	0.25869	0.213442	0.402872	0.224142	0.30433	0.288389	0.291694	ND
49	71	FVPGEPSTQDGNGHGTHVAGTIA	2249.06	3.65072	3.90572	4.14945	4.3851	4.28955	3.96094	4.2794	4.51602	4.33474	ND	0.107777	0.0745	0.054861	0.231358	0.090131	0.179807	0.124257	0.057031	ND
49	73	FVPGEPSTQDGNGHGTHVAGTIAAL	2433.18	4.49261	3.8954	4.19011	4.33168	4.3009	3.78633	4.20381	4.35205	4.18179	5.42465	0.106521	0.045367	0.064739	0.188278	0.112608	0.19966	0.109916	0.102565	0.019076
50	71	VPGEPSTQDGNGHGTHVAGTIA	2101.99	3.24944	3.80535	4.1869	4.28188	4.22791	3.94389	4.2571	4.37683	4.20415	6.17471	0.131743	0.127788	0.168716	0.267436	0.087183	0.329566	0.186648	0.018747	0.175368
50	73	VPGEPSTQDGNGHGTHVAGTIAAL	2286.11	4.27462	3.85886	4.14554	4.26667	4.22687	3.82946	4.1584	4.3297	4.13554	2.44178	0.185042	0.15765	0.161615	0.245483	0.17876	0.198236	0.130734	0.100702	0.030178
51	69	PGEPSTQDGNGHGTHVAGT	1818.8	3.6133	3.55423	3.96064	4.5743	4.57255	3.68133	4.01973	4.64775	4.63774	2.06736	0.130478	0.324034	0.242873	0.255361	0.33787	0.384032	0.221956	0.297205	0.052897
51	71	PGEPSTQDGNGHGTHVAGTIA	2002.92	3.84383	3.64266	3.95149	4.74566	4.61138	3.60543	3.84132	4.76351	4.47155	ND	0.137249	0.149376	0.283784	0.313969	0.205488	0.378486	0.322047	0.396583	ND
51	72	PGEPSTQDGNGHGTHVAGTIAA	2073.96	3.84066	3.63109	3.89368	4.59676	4.66124	3.77467	3.9995	4.60868	4.47245	ND	0.408324	0.304773	0.105592	0.201874	0.407959	0.520966	0.323322	0.315095	ND
51	73	PGEPSTQDGNGHGTHVAGTIAAL	2187.04	4.45564	3.5487	3.86769	4.33109	4.34099	3.53211	3.98881	4.47136	4.34462	ND	0.147911	0.131623	0.103796	0.166609	0.128108	0.181537	0.121117	0.093656	ND
54	73	PSTQDGNGHGTHVAGTIAAL	1903.93	4.45117	3.1405	3.45075	3.86431	3.83781	3.24639	3.52642	3.97984	3.80334	4.0461	0.192587	0.125854	0.120372	0.168818	0.20455	0.275033	0.172504	0.248346	0.146464
72	80	ALNNSIGVL	900.515	5.29005	1.71744	1.79812	1.8636	2.07649	1.71938	1.85057	1.90799	2.2085	9.82046	0.043172	0.028658	0.039211	0.061586	0.035156	0.080288	0.034748	0.047787	0.015837
73	80	LNNSIGVL	829.478	5.15337	1.36515	1.40813	1.43703	1.61556	1.32005	1.36711	1.432	1.63777	4.91603	0.02102	0.046107	0.01968	0.081175	0.042683	0.085373	0.029837	0.018112	0.068832
73	88	LNNSIGVLGVAPSAEL	1553.85	5.64503	1.74385	1.80061	2.00409	2.17631	1.80712	1.84486	2.05144	2.19042	4.10222	0.101701	0.046404	0.079249	0.077785	0.078287	0.135837	0.077936	0.12019	0.025005
74	80	NNSIGVL	716.394	4.89554	1.25245	1.27436	1.30704	1.43452	1.2562	1.29577	1.3596	1.47671	2.05909	0.018206	0.012926	0.009405	0.035517	0.025347	0.045655	0.02718	0.015563	0.012818
74	88	NNSIGVLGVAPSAEL	1440.77	5.50773	1.70745	1.76838	1.88874	1.95495	1.83192	1.9038	1.93536	1.96147	2.66771	0.134084	0.127394	0.15591	0.143537	0.118788	0.122987	0.093235	0.070965	0.013176
81	88	GVAPSAEL	743.393	4.16501	0.556573	0.563908	0.602671	0.548561	0.597822	0.611282	0.617774	0.591181	4.74951	0.014792	0.045894	0.053863	0.009199	0.056968	0.035261	0.039128	0.030393	0.060361
89	104	YAVKVLGASGSGSVSS	1468.76	3.86123	5.1352	5.26833	5.34543	5.58415	5.01819	5.18234	5.4503	5.59391	3.59581	0.089529	0.11335	0.251104	0.212971	0.028165	0.148987	0.219256	0.103214	0.008493
89	107	YAVKVLGASGSGSVSSIAQ	1780.94	4.20077	5.21134	5.72594	6.77073	7.20079	5.33057	5.79085	6.87634	7.47657	7.30562	0.139148	0.174683	0.147491	0.328511	0.124009	0.317414	0.19064	0.058114	0.054354
89	108	YAVKVLGASGSGSVSSIAQG	1837.97	4.24689	5.51454	5.89704	7.14988	7.50541	5.45245	5.78536	6.95195	7.53284	4.06356	0.273537	0.161899	0.270021	0.349683	0.192038	0.207697	0.263965	0.256474	0.102631
89	109	YAVKVLGASGSGSVSSIAQGL	1951.05	5.06812	5.2428	5.722	6.92344	7.32295	5.14504	5.6006	6.73017	7.25447	1.99253	0.124673	0.097769	0.120499	0.270926	0.090221	0.20059	0.115895	0.139251	0.046243
89	110	YAVKVLGASGSGSVSSIAQGLE	2080.09	4.98295	5.2185	5.70654	6.8901	7.28656	5.13608	5.60457	6.68891	7.24243	8.09495	0.133841	0.1195	0.140075	0.282351	0.083248	0.206555	0.123098	0.156523	0.126498
89	117	YAVKVLGASGSGSVSSIAQGLEWAGNNGM	2810.38	5.84535	6.04023	6.66746	8.22665	8.99721	6.00548	6.62045	7.97435	8.90031	4.46974	0.158687	0.099743	0.092031	0.278193	0.155041	0.238642	0.159209	0.198354	0.006821
89	122	YAVKVLGASGSGSVSSIAQGLEWAGNNGMHVANL	3344.67	5.92849	6.0118	6.71568	8.44711	9.20446	5.9564	6.57385	8.00451	9.0276	2.74312	0.23716	0.197435	0.199243	0.307148	0.229965	0.236663	0.251482	0.195284	0.041079
91	109	VKVLGASGSGSVSSIAQGL	1716.95	4.84728	5.40181	5.86117	7.09404	7.61005	5.37573	5.76027	6.86528	7.50115	7.61554	0.178451	0.122068	0.162594	0.208803	0.117307	0.208158	0.138571	0.121607	0.0263
105	109	IAQGL	501.303	3.87627	0.416896	0.452187	0.681984	0.888661	0.367891	0.413388	0.582744	0.766935	6.2134	0.042602	0.043789	0.064907	0.07661	0.038749	0.055417	0.032908	0.041734	0.017
105	110	IAQGLE	630.346	3.50948	0.513262	0.504804	0.693821	0.880458	0.68185	0.630141	0.737638	0.829185	5.84355	0.015117	0.047822	0.031387	0.069089	0.082546	0.063051	0.026052	0.037788	0.026186
105	117	IAQGLEWAGNNGM	1360.63	5.26484	1.65014	1.76952	2.0832	2.51902	1.76055	1.8035	2.11122	2.44383	7.66713	0.073041	0.088483	0.106091	0.111923	0.094697	0.103918	0.061087	0.052075	0.0453
105	122	IAQGLEWAGNNGMHVANL	1894.92	5.38677	1.76262	1.91512	2.5424	2.95323	2.02719	2.29456	2.52826	2.8187	11.5938	0.282173	0.219065	0.206569	0.16526	0.343117	0.334629	0.289622	0.125401	0.04751
109	122	LEWAGNNGMHVANL	1525.72	5.22375	1.80595	1.72005	2.14424	2.27827	1.92114	1.88825	1.95731	2.26763	13.4384	0.140188	0.168062	0.173778	0.068975	0.241834	0.152004	0.132506	0.187661	0.030035
110	117	EWAGNNGM	878.346	4.35955	1.25622	1.33225	1.46561	1.69435	1.33299	1.39768	1.5055	1.73572	3.89495	0.052552	0.057762	0.048701	0.12071	0.057612	0.093906	0.047384	0.056843	0.038754
110	122	EWAGNNGMHVANL	1412.64	4.83993	1.41202	1.45936	1.61248	1.79187	1.41924	1.5412	1.65969	1.75977	7.71935	0.037851	0.055792	0.091082	0.061574	0.061466	0.086785	0.055483	0.038974	0.07878
111	117	WAGNNGM	749.303	4.19707	1.18442	1.25	1.38379	1.59437	1.2861	1.41171	1.63232	1.7491	13.8673	0.049729	0.035703	0.054511	0.114186	0.078213	0.110596	0.107833	0.109091	0.129203
111	122	WAGNNGMHVANL	1283.6	4.76046	1.35663	1.47104	1.62383	1.75394	1.34602	1.48852	1.66399	1.74475	5.23647	0.026431	0.049378	0.047026	0.0631	0.067328	0.075932	0.05225	0.021252	0.02741
118	122	HVANL	553.309	3.26464	0.342437	0.342116	0.367264	0.346514	0.33255	0.331768	0.34094	0.320824	4.14839	0.005683	0.020766	0.034188	0.004671	0.038799	0.020053	0.028094	0.017257	0.045581
123	132	SLGSPSPSAT	903.442	3.12204	3.12659	3.17179	3.14426	3.22527	3.17145	3.26171	3.3215	3.19943	4.5342	0.070946	0.092275	0.086984	0.165509	0.034911	0.229881	0.135147	0.187033	0.0281
123	133	SLGSPSPSATL	1016.53	4.30588	3.69845	3.743	3.7371	3.74637	3.63077	3.7129	3.76404	3.71214	7.274	0.107051	0.14077	0.101055	0.155414	0.098965	0.159971	0.141859	0.146613	0.0198
123	134	SLGSPSPSATLE	1145.57	4.04224	3.54163	3.5606	3.78044	4.07866	3.60117	3.61349	3.80008	4.19273	6.88984	0.461268	0.510259	0.54723	0.469182	0.347315	0.508115	0.559226	0.341276	0.031448
123	135	SLGSPSPSATLEQ	1273.63	3.90624	4.32899	4.49263	5.10738	5.24635	3.99992	4.16624	4.74669	4.98037	5.237	0.497605	0.40187	0.621544	0.476475	0.317167	0.244865	0.226667	0.184761	0.036273
123	146	SLGSPSPSATLEQAVNSATSRGVL	2329.2	5.85196	4.92991	5.32483	6.78454	8.48798	4.9153	5.47349	7.01564	8.70004	3.95932	0.108338	0.111932	0.095913	0.27176	0.082158	0.178216	0.134127	0.182574	0.041079
125	133	GSPSPSATL	816.41	4.30672	3.17261	2.95662	2.96759	3.04518	2.94573	3.07294	3.37313	2.92304	11.792	0.095976	0.13914	0.078679	0.151897	0.16647	0.12178	0.071566	0.208592	0.026554
127	133	PSPSATL	672.356	4.30486	2.06033	2.06362	2.27868	2.18528	2.3005	2.18235	2.49578	2.383	7.60053	0.067212	0.07871	0.188702	0.217805	0.065986	0.134376	0.202204	0.186557	0.09882
132	146	TLEQAVNSATSRGVL	1545.82	5.07424	2.09143	2.3977	3.56542	4.92549	2.35246	2.46056	3.91604	4.81168	7.10929	0.129605	0.082758	0.071943	0.392149	0.119605	0.088627	0.132615	0.170153	0.036945
133	146	LEQAVNSATSRGVL	1444.78	4.1283	1.49082	1.7654	2.49565	3.33481	1.56403	1.88465	2.669	3.55322	6.45263	0.066902	0.060619	0.092609	0.149021	0.080577	0.069502	0.071358	0.023807	0.035368
134	146	EQAVNSATSRGVL	1331.69	3.90315	1.43814	1.68795	2.26457	3.0265	1.43747	1.75005	2.3702	3.16882	7.41219	0.050096	0.047694	0.049253	0.127893	0.087287	0.090717	0.060823	0.03131	0.03286
135	146	QAVNSATSRGVL	1202.65	3.83461	1.37143	1.59282	2.10851	2.56295	1.3573	1.57751	2.1322	2.62019	9.6395	0.084862	0.080438	0.116455	0.175089	0.100082	0.097344	0.084936	0.125385	0.0209
136	153	AVNSATSRGVLVVAASGN	1672.9	3.8442	2.08208	2.1821	2.57379	2.93379	1.85771	1.98005	2.31979	2.60018	10.7064	0.160907	0.153559	0.175908	0.353233	0.288911	0.459977	0.290956	0.259414	0.042
147	168	VVAASGNSGAGSISYPARYANA	2083.02	3.98838	5.22017	6.30872	7.59523	9.30035	4.73274	5.8704	7.71059	9.32082	7.02946	0.132754	0.076269	0.157398	0.375441	0.171777	0.22984	0.054094	0.21284	0.019346
160	168	SYPARYANA	1012.48	3.98449	2.15246	2.62299	3.25714	4.3646	2.41756	2.53768	3.65514	4.30441	4.89206	0.120783	0.165519	0.083361	0.209119	0.185326	0.194178	0.090724	0.028593	0.033732
162	168	PARYANA	762.389	3.98353	1.70893	2.02446	2.53757	3.27133	1.61282	1.86394	2.59796	3.34255	4.96131	0.11018	0.06409	0.135974	0.163737	0.109295	0.119765	0.142011	0.159621	0.06424
169	183	MAVGATDQNNNRASF	1595.72	3.94184	4.05459	4.16246	4.60912	5.22213	4.04928	4.08932	4.63361	5.07675	7.33292	0.106739	0.044813	0.105558	0.234698	0.084553	0.132574	0.069981	0.111299	0.053176
184	190	SQYGAGL	695.336	4.21851	1.27073	1.57375	2.2367	2.51757	1.22837	1.35992	2.19542	2.52688	4.24163	0.037438	0.039804	0.057671	0.113408	0.031689	0.082593	0.018519	0.064855	0.031693
184	191	SQYGAGLD	810.363	3.79892	1.33276	1.5415	2.3908	2.54969	1.27566	1.44887	2.26605	2.52166	2.6418	0.03464	0.0339	0.065	0.07601	0.05556	0.06407	0.02345	0.06756	0.08475
186	204	YGAGLDIVAPGVNVQSTYP	1920.97	4.2248	2.76884	2.90239	3.14877	2.94115	NA	NA	NA	NA	3.21877	0.096092	0.117958	0.229083	0.203325	NA	NA	NA	NA	0.019149
191	198	DIVAPGVN	784.42	3.84653	0.750365	0.883606	0.950612	0.973678	0.681749	0.820481	0.89149	0.881671	3.02	0.045413	0.009903	0.031369	0.03261	0.045858	0.02696	0.033547	0.022248	0.18
191	207	DIVAPGVNVQSTYPGST	1704.84	4.40902	2.4447	2.9424	3.58982	3.77294	1.99402	2.51564	3.24412	3.34048	NA	0.105537	0.060329	0.076649	0.120723	0.089468	0.130782	0.06498	0.063767	NA
191	208	DIVAPGVNVQSTYPGSTY	1867.91	4.8204	2.31253	2.96783	3.8025	3.85335	2.35449	3.11482	3.91711	3.97128	7.77	0.115494	0.112607	0.101062	0.15239	0.097929	0.166859	0.123274	0.012822	0.48
192	198	IVAPGVN	669.393	3.44782	0.647909	0.806128	0.885286	0.891286	0.740123	0.828399	0.938708	0.923426	2.23	0.025403	0.04012	0.038173	0.037799	0.063422	0.059212	0.040485	0.015296	0.14
192	207	IVAPGVNVQSTYPGST	1589.82	4.13801	1.8389	2.32298	3.06607	3.15139	1.92563	2.39711	3.14042	3.19928	5.29	0.055098	0.034954	0.026044	0.089932	0.115231	0.188747	0.081223	0.059924	0.46
192	208	IVAPGVNVQSTYPGSTY	1752.88	4.57009	2.19831	2.90091	3.76439	3.7681	2.48947	3.26933	4.08596	3.99032	7.44	0.061487	0.055549	0.091266	0.075306	0.102433	0.150793	0.105403	0.097462	0.29
199	207	VQSTYPGST	939.442	3.12292	1.19039	1.32082	1.66293	1.64765	1.22801	1.31592	1.71205	1.71387	3.45	0.097531	0.125395	0.107409	0.152061	0.118682	0.176199	0.163656	0.195283	0.22
199	208	VQSTYPGSTY	1102.51	3.93683	1.71152	2.06951	2.45907	2.43624	1.78123	2.14329	2.45663	2.50545	NA	0.083436	0.079952	0.074798	0.042026	0.22747	0.193074	0.1536	0.13095	NA
208	215	YASLNGTS	812.379	3.44666	1.80291	1.98357	2.03845	2.52138	NA	NA	NA	NA	NA	0.079361	0.072347	0.059508	0.114313	NA	NA	NA	NA	NA
208	226	YASLNGTSMATPHVAGAAA	1789.85	4.08971	2.71402	3.02516	3.40195	3.92743	NA	NA	NA	NA	NA	0.182009	0.199369	0.222341	0.250675	NA	NA	NA	NA	NA
208	227	YASLNGTSMATPHVAGAAAL	1902.94	4.67222	2.75042	3.04406	3.65084	3.97436	NA	NA	NA	NA	NA	0.105419	0.13614	0.523422	0.306861	NA	NA	NA	NA	NA
209	226	ASLNGTSMATPHVAGAAA	1626.79	3.78548	3.07571	3.46231	4.42144	4.39419	NA	NA	NA	NA	NA	0.070882	0.24732	0.08913	0.06792	NA	NA	NA	NA	NA
209	227	ASLNGTSMATPHVAGAAAL	1739.87	4.44723	1.97991	2.10206	2.68951	3.48402	NA	NA	NA	NA	NA	1.01473	1.3376	1.21307	1.21167	NA	NA	NA	NA	NA
212	224	NGTSMATPHVAGA	1213.56	3.47625	1.64307	1.6544	1.83082	2.18612	NA	NA	NA	NA	NA	0.067581	0.07239	0.081916	0.106595	NA	NA	NA	NA	NA
212	226	NGTSMATPHVAGAAA	1355.64	3.39615	1.85091	1.9394	2.13006	2.44363	NA	NA	NA	NA	NA	0.067205	0.065881	0.100324	0.067721	NA	NA	NA	NA	NA
212	227	NGTSMATPHVAGAAAL	1468.72	4.20892	1.99202	2.08621	2.26908	2.5414	NA	NA	NA	NA	NA	0.069609	0.083689	0.131914	0.061649	NA	NA	NA	NA	NA
216	227	MATPHVAGAAAL	1109.58	4.20161	1.2705	1.26578	1.35998	1.37257	1.32534	1.30065	1.31065	1.32322	5.14	0.085248	0.103175	0.119284	0.012593	0.107832	0.117159	0.150724	0.10262	0.11
217	227	ATPHVAGAAAL	978.537	3.83777	0.988289	1.04853	1.11701	1.09744	1.19217	1.1802	1.23101	1.15765	NA	0.086558	0.08029	0.109545	0.108929	0.120097	0.096813	0.099711	0.083243	NA
227	251	LVKQKNPSWSNVQIRNHLKNTATSL	2876.59	4.00776	3.49668	4.14312	4.68532	5.22455	3.51138	4.19742	4.64451	5.14993	11.05	0.127735	0.094876	0.110508	0.169139	0.176991	0.172722	0.162926	0.143521	0.28
227	256	LVKQKNPSWSNVQIRNHLKNTATSLGSTNL	3348.81	4.22573	5.25024	6.10593	7.01732	7.5455	5.19588	6.18156	7.02425	7.43217	14.9	0.204611	0.143335	0.145224	0.325455	0.203232	0.257314	0.18659	0.083487	0.5
228	238	VKQKNPSWSNV	1286.69	3.91094	2.18868	2.47963	2.71143	3.09873	2.23227	2.57849	2.79272	3.09897	4.39	0.055536	0.039499	0.059913	0.134445	0.062907	0.073272	0.055266	0.023864	0.14
228	251	VKQKNPSWSNVQIRNHLKNTATSL	2763.5	3.97064	3.37091	3.97697	4.56213	5.00892	3.33159	4.05682	4.57823	4.96272	10.77	0.104901	0.054779	0.113295	0.174196	0.147259	0.145105	0.113846	0.06884	0.36
228	256	VKQKNPSWSNVQIRNHLKNTATSLGSTNL	3235.73	4.19473	5.20719	6.11621	6.98115	7.49017	5.11329	6.1348	7.05801	7.44159	13.64	0.159418	0.113289	0.06868	0.272273	0.129432	0.259485	0.126134	0.12751	0.38
238	251	VQIRNHLKNTATSL	1594.9	3.41009	1.78975	2.10248	2.1634	2.18737	1.77733	2.13998	2.12228	2.11832	5.98	0.087662	0.12014	0.111957	0.078948	0.128252	0.083921	0.165662	0.132161	0.27
238	256	VQIRNHLKNTATSLGSTNL	2067.13	3.84458	2.29686	2.50217	2.79965	3.13287	2.32172	2.52918	2.84891	3.0673	6.52	0.058755	0.027967	0.08172	0.132628	0.123773	0.135173	0.101218	0.042217	0.29
239	251	QIRNHLKNTATSL	1495.83	3.18613	1.72524	2.00804	2.08761	2.11237	1.79127	2.08053	2.11753	2.14914	5.43	0.056197	0.067813	0.071901	0.070583	0.126974	0.11872	0.105566	0.093107	0.17
239	256	QIRNHLKNTATSLGSTNL	1968.06	3.70969	3.85746	4.37924	4.71274	4.82284	3.777	4.34957	4.75399	4.66832	8.17	0.099272	0.108628	0.070384	0.17721	0.046738	0.212872	0.138383	0.077796	0.31
252	256	GSTNL	491.246	3.26465	1.21327	1.43155	1.6528	1.6866	1.14936	1.36004	1.66857	1.63762	2.36	0.043162	0.05129	0.036477	0.070812	0.014334	0.067921	0.043003	0.035323	0.23
257	261	YGSGL	496.24	4.00321	0.5047	0.519503	0.619232	0.728169	0.494034	0.489871	0.571512	0.665247	1.44	0.017183	0.062694	0.049385	0.036779	0.050969	0.025373	0.018681	0.014496	0.07
257	264	YGSGLVNA	780.389	4.05429	0.886785	0.874523	0.996282	1.13232	0.854818	0.873623	1.028	1.00525	3.07	0.047552	0.056291	0.067639	0.035975	0.087843	0.117896	0.083369	0.063041	0.15
257	269	YGSGLVNAEAATR	1308.65	3.80261	0.903731	1.06741	1.3369	1.84707	0.945406	1.18108	1.33623	1.73435	6.17	0.127701	0.061217	0.147492	0.024998	0.104008	0.066689	0.097642	0.028524	0.24
262	269	VNAEAATR	831.432	2.36231	1.07214	1.17794	1.31125	1.58795	1.05405	0.778725	1.07008	1.72858	NA	0.213678	0.093007	0.099903	0.041214	0.341784	0.182568	0.361586	0.109255	NA
